# Supplementary material for: Stearoyl-CoA desaturase 1 and paracrine diffusible signals have a major role in the promotion of breast cancer cell migration induced by cancer-associated fibroblasts
Source: PubMed Central journal article supplement (PMC4430719; doi:10.1038/bjc.2015.135), 2015-04-16

# siRNAs

ctrl

SCD1\_1

SCD1\_2

ctrl

SCD1\_1

SCD1\_2

SCD1

37kDa

$\beta$ -Actin

MCF-7

MDA-MB-231

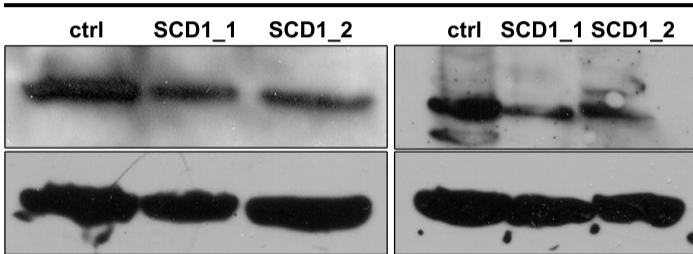

Supplement: bjc2015135x3.pdf [file bjc2015135x3.pdf]
