# Supplementary material for: Stearoyl-CoA desaturase 1 and paracrine diffusible signals have a major role in the promotion of breast cancer cell migration induced by cancer-associated fibroblasts
Source: PubMed Central journal article supplement (PMC4430719; doi:10.1038/bjc.2015.135), 2015-04-16

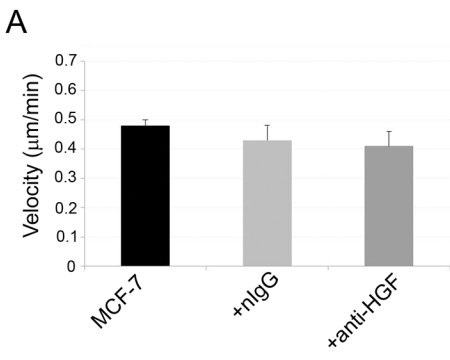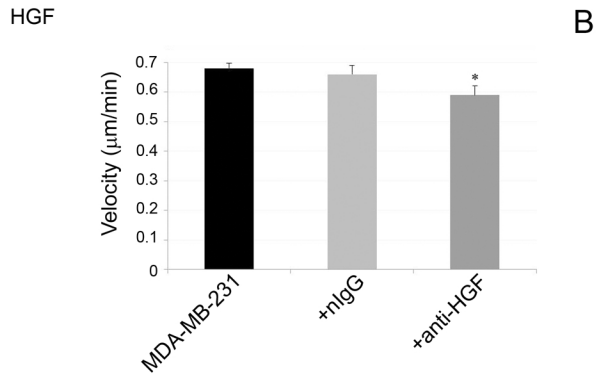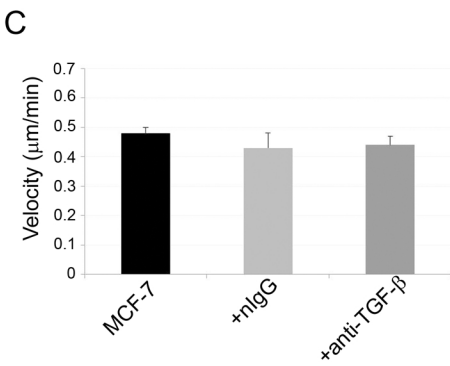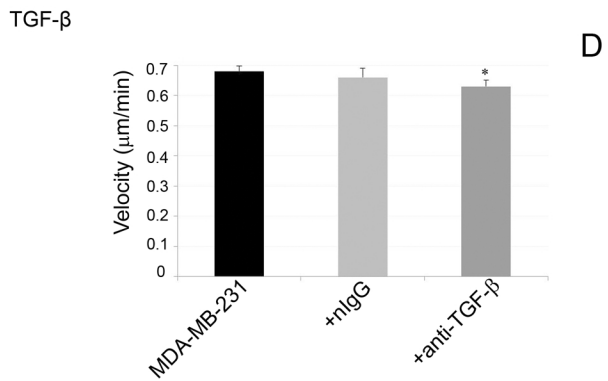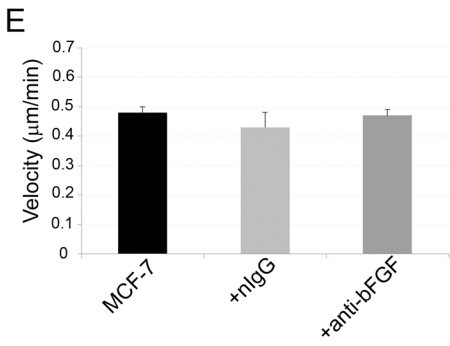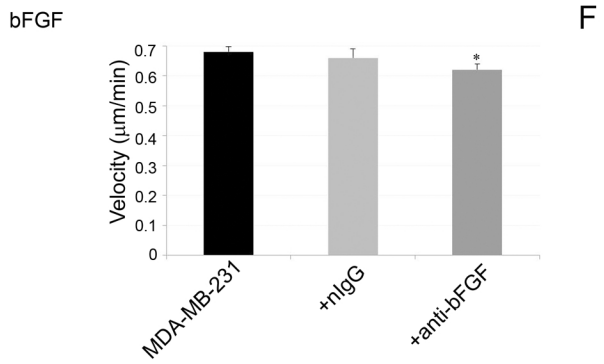

Supplement: bjc2015135x4.pdf [file bjc2015135x4.pdf]
